# Supplementary material
Source: PubMed Central journal article supplement (PMC4426454)
Supplement: pnas.201500938SI.pdf [file pnas.201500938SI.pdf]

# Supporting Information

Eggl et al. 10.1073/pnas.1500938112

**Table S1. Measured density of the fluids in the fluid phantom**

| Sample | Solution, wt %                                                                            | Density $\rho_s$ , g/cm <sup>3</sup> |
|--------|-------------------------------------------------------------------------------------------|--------------------------------------|
| 1      | H <sub>2</sub> O(demineralized)                                                           | 0.997                                |
| 2      | C <sub>3</sub> H <sub>8</sub> O <sub>3</sub>                                              | 1.260                                |
| 3      | C <sub>3</sub> H <sub>8</sub> O <sub>3</sub> (75%) + C <sub>2</sub> H <sub>6</sub> O(25%) | 1.110                                |
| 4      | C <sub>3</sub> H <sub>8</sub> O <sub>3</sub> (50%) + C <sub>2</sub> H <sub>6</sub> O(50%) | 0.982                                |
| 5      | H <sub>2</sub> O(95%) + NaCl(5%)                                                          | 1.033                                |
| 6      | H <sub>2</sub> O(90%) + NaCl(10%)                                                         | 1.069                                |
| 7      | C <sub>2</sub> H <sub>6</sub> O(98.75%) + NaCl(1.25%)                                     | 0.800                                |

The density was measured using the buoyancy of a gauged glass structure. Data from ref. 1.

1. Tapfer A, et al. (2012) Experimental results from a preclinical X-ray phase-contrast CT scanner. *Proc Natl Acad Sci USA* 109(39):15691–15696.
